# Supplementary material for: A pan-cancer analysis of the oncogenic role of Golgi transport 1B in human tumors
Source: PubMed Central journal article supplement (PMC10732491; doi:10.2478/jtim-2023-0002), 2023-12-20
Supplement: jtim-2023-0002_sm.pdf [file jtim-2023-0002_sm.pdf]

**Table S1: Function list of associated molecules**

| Function                                                                                        | FDR         | Genes in network | Genes in genome |
|-------------------------------------------------------------------------------------------------|-------------|------------------|-----------------|
| regulation of transforming growth factor beta receptor signaling pathway                        | 0.00036828  | 5                | 86              |
| regulation of epithelial to mesenchymal transition                                              | 0.00036828  | 5                | 76              |
| cellular response to transforming growth factor beta stimulus                                   | 0.00036828  | 6                | 169             |
| transforming growth factor beta receptor signaling pathway                                      | 0.000410778 | 5                | 103             |
| negative regulation of transmembrane receptor protein serine/threonine kinase signaling pathway | 0.000410778 | 5                | 102             |
| response to transforming growth factor beta                                                     | 0.000410778 | 6                | 195             |
| regulation of cellular response to transforming growth factor beta stimulus                     | 0.000410778 | 5                | 104             |
| epithelial to mesenchymal transition                                                            | 0.000434269 | 5                | 108             |
| regulation of cellular response to growth factor stimulus                                       | 0.000475618 | 6                | 222             |
| transforming growth factor beta receptor binding                                                | 0.00112887  | 3                | 14              |
| regulation of pathway-restricted SMAD protein phosphorylation                                   | 0.001231135 | 4                | 58              |
| pathway-restricted SMAD protein phosphorylation                                                 | 0.001294982 | 4                | 60              |
| transmembrane receptor protein serine/threonine kinase signaling pathway                        | 0.001338792 | 6                | 282             |
| mesenchymal cell differentiation                                                                | 0.003577738 | 5                | 185             |
| regulation of transmembrane receptor protein serine/threonine kinase signaling pathway          | 0.005012526 | 5                | 201             |
| ventricular septum development                                                                  | 0.005610916 | 3                | 27              |
| phosphatidylethanolamine metabolic process                                                      | 0.005909839 | 3                | 28              |
| mesenchyme development                                                                          | 0.00593508  | 5                | 216             |
| cardiac septum morphogenesis                                                                    | 0.019682002 | 3                | 43              |
| cardiac ventricle morphogenesis                                                                 | 0.033243782 | 3                | 52              |
| cardiac septum development                                                                      | 0.048711549 | 3                | 60              |
| regulation of cardiac epithelial to mesenchymal transition                                      | 0.056968083 | 2                | 10              |
| cardiac ventricle development                                                                   | 0.073634251 | 3                | 71              |
| cardiac chamber morphogenesis                                                                   | 0.097012396 | 3                | 79              |

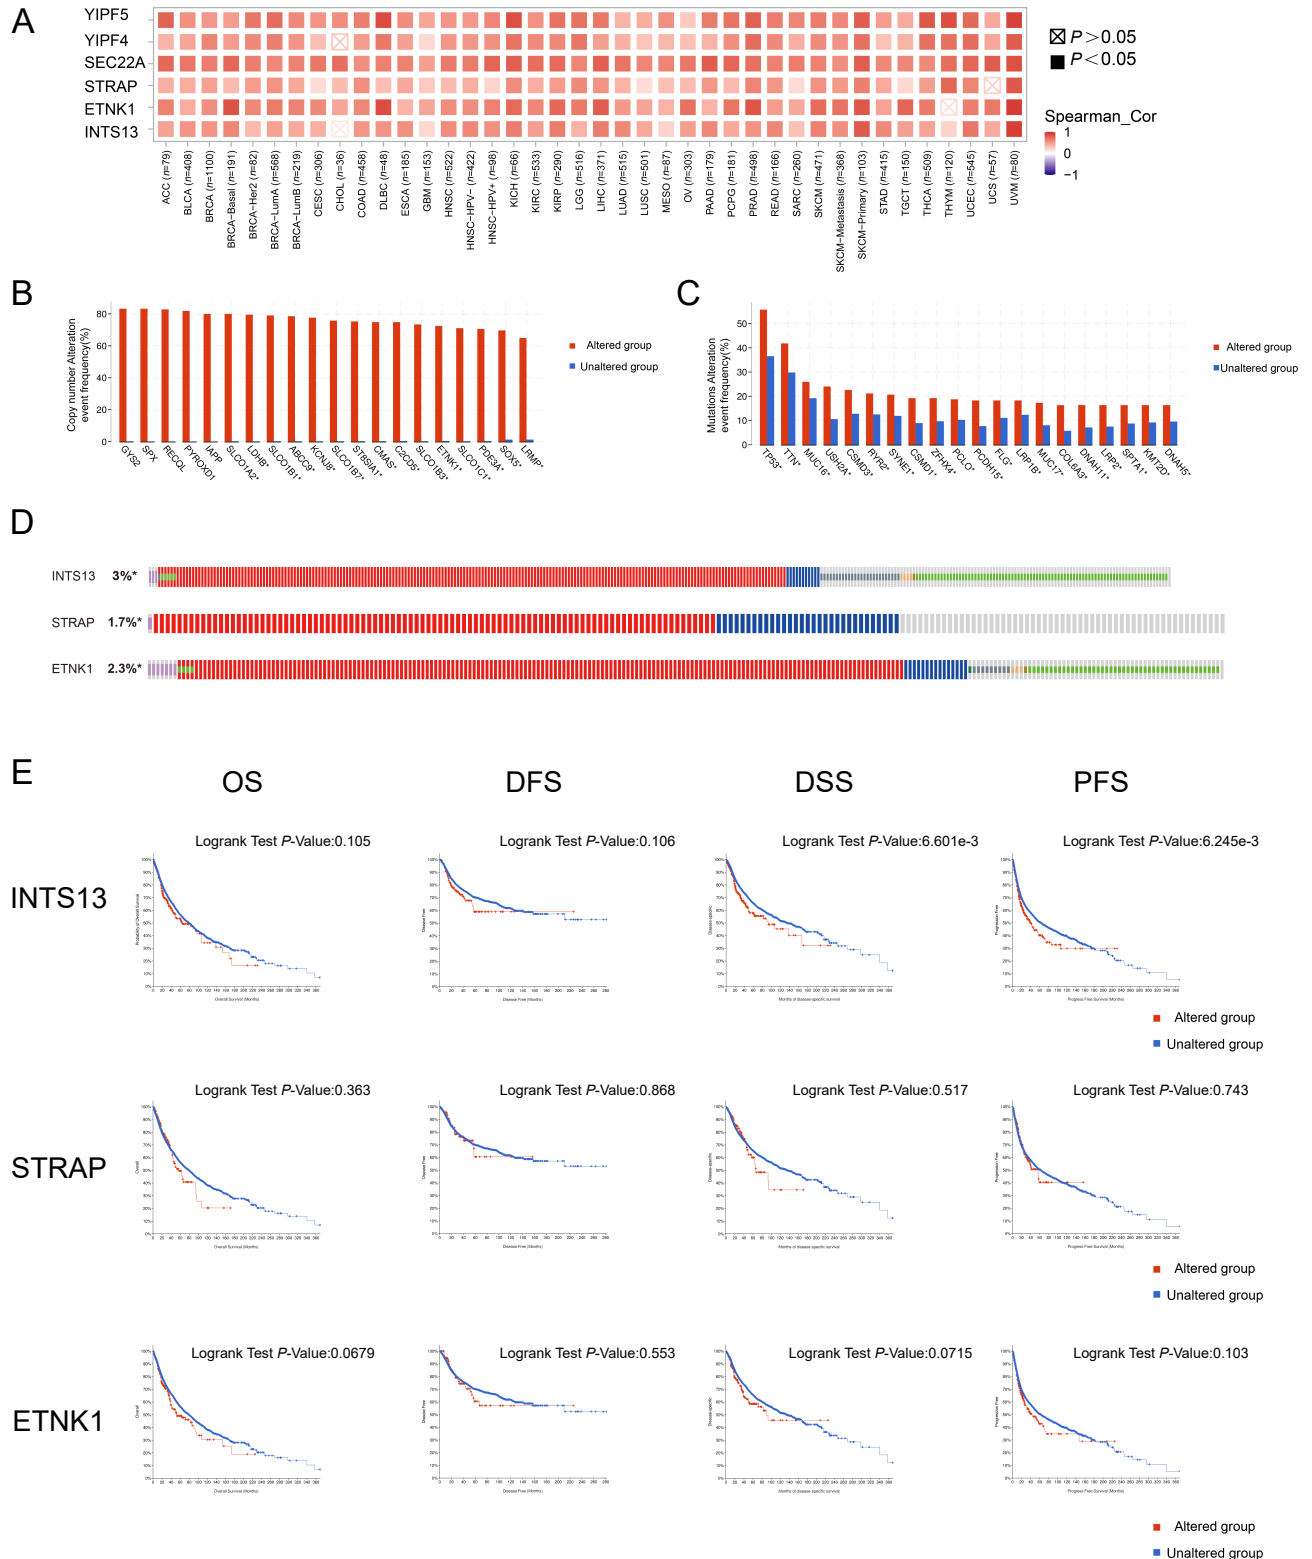

**Figure S1:** (A) The corresponding heatmap data of GOLT1B and intersection genes in the detailed cancer types. (B-C) Top20 genes with highest frequency in GOLT1B copy number alteration tumor groups and mutations alteration tumor groups of TCGA tumor. (D) Types of the genetic alteration of STRAP, INTS13 and ETNK1. (E) The potential correlation between the clinical survival prognosis of pan-cancer and genetic alteration of STRAP, INTS13 and ETNK1.
